1 **Neural representation of intraoral olfactory and gustatory signals by the mediodorsal thalamus**  
2 **in alert rats**

3  
4 Kelly E. Fredericksen<sup>1</sup> and Chad L. Samuelsen<sup>1</sup>

5  
6 *1 Department of Anatomical Sciences and Neurobiology, University of Louisville, Louisville KY, 40292*

7  
8 ***Running Title: Thalamic processing of chemosensory signals***

9  
10 Page Number: 35

11 Number of Figures: 6

12 Word count Abstract: 154

13 Word count Significance Statement: 109

14 Word count Introduction: 578

15 Word count Discussion: 1347

16  
17 Conflict of Interest: The authors declare no competing financial interest.

18  
19 **Acknowledgements:** This work was supported by a National Institute of Deafness and Other  
20 Communication Disorders Grant (R01-DC018273; CS). The authors would like to thank Dr. Sanaya  
21 Stocke for the helpful comments and discussions.

22  
23 **Send Correspondence to:**

24 Chad Samuelsen, PhD

25 Department of Anatomical Sciences and Neurobiology

26 Medical Dental Research Building, Room 433

27 University of Louisville School of Medicine

28 Louisville, KY 40202

29 chad.samuelsen@louisville.edu

30 Tel (502) 852-5169

31 Fax (502) 852 6228

32

33

34

35 **Abstract**

36 The mediodorsal thalamus is a higher-order thalamic nucleus involved in a variety of cognitive behaviors,  
37 including olfactory attention, odor discrimination, and the hedonic perception of flavors. Although it forms  
38 connections with principal regions of the olfactory and gustatory networks, its role in processing olfactory  
39 and gustatory signals originating from the mouth remains unclear. Here, we recorded single-unit activity  
40 in the mediodorsal thalamus of behaving rats during the intraoral delivery of individual odors, individual  
41 tastes, and odor-taste mixtures. Our results are the first to demonstrate that neurons in the mediodorsal  
42 thalamus dynamically encode chemosensory signals originating from the mouth. This chemoselective  
43 population is broadly tuned, responds with excitation and suppression, and represents odor-taste  
44 mixtures differently than their odor and taste components. Furthermore, a subset of chemoselective  
45 neurons encoded taste palatability. Our results further demonstrate the multidimensionality of the  
46 mediodorsal thalamus and provides additional evidence of its involvement in processing chemosensory  
47 information important for consummatory behaviors.

48

49

50

51

52

53

54

55

56

57

58

59

60

61 **SIGNIFICANCE STATEMENT**

62 The perception of food relies upon the concurrent processing of olfactory and gustatory signals originating  
63 from the mouth. The mediodorsal thalamus is a higher-order thalamic nucleus involved in a variety of  
64 chemosensory-dependent behaviors and connects the olfactory and gustatory cortices with prefrontal  
65 cortex. However, it is unknown how neurons in the mediodorsal thalamus process intraoral  
66 chemosensory signals. Using tetrode recordings in alert rats, our results are the first to show that neurons  
67 in the mediodorsal thalamus dynamically represent olfactory and gustatory signals from the mouth. Our  
68 findings suggest that the mediodorsal thalamus is a key node between sensory and higher-order cortical  
69 areas for processing chemosensory information underlying consummatory behavior.

70

71

72

73

74

75

76

77

78

79

80

81

82

83

84

85

86

## 87 **Introduction**

88       The perception of food, and ultimately the decision whether to eat it or not, requires the integration  
89 and discrimination of multisensory signals from the mouth (Sclafani, 2001; Verhagen and Engelen, 2006).  
90 While all senses contribute, the concurrent activation of the olfactory and gustatory systems is essential  
91 for giving food its flavor (Small, 2012; Prescott, 2015). This multisensory process generates enduring  
92 odor-taste associations that are crucial for guiding future food choices (Fanselow and Birk, 1982; Schul  
93 et al., 1996; Sakai and Yamamoto, 2001; Gautam and Verhagen, 2010; Green et al., 2012; McQueen et  
94 al., 2020). These experience-dependent behaviors rely upon a network of brain regions to integrate and  
95 process multimodal chemosensory signals to guide consummatory choice (Samuelsen and Vincis, 2021).

96       The mediodorsal thalamus is a higher-order thalamic nucleus involved in an array of cognitive  
97 functions, including attention (Plailly et al., 2008; Veldhuizen and Small, 2011; Schmitt et al., 2017; Rikhye  
98 et al., 2018), valuation (Rousseaux et al., 1996; Sela et al., 2009; Tham et al., 2011; Alcaraz et al., 2018),  
99 memory (Parnaudeau et al., 2013; Bolkan et al., 2017; Scott et al., 2020), and stimulus-outcome  
100 associations (Oyoshi et al., 1996; Kawagoe et al., 2007; Courtiol and Wilson, 2016). It receives  
101 projections from primary olfactory cortical areas (e.g., piriform cortex), is reciprocally connected with the  
102 gustatory cortex, and forms dense reciprocal connections with higher-order cortical areas important for  
103 decision-making (Price and Slotnick, 1983; Kuroda et al., 1992; Ray and Price, 1992; Shi and Cassell,  
104 1998; Kuramoto et al., 2017; Pelzer et al., 2017). As the first thalamic nucleus to receive olfactory input,  
105 studies have focused on the role of the mediodorsal thalamus in a variety of experience-dependent  
106 olfactory behaviors, including olfactory attention (Plailly et al., 2008; Small et al., 2008; Tham et al., 2009;  
107 Veldhuizen and Small, 2011), odor discrimination (Eichenbaum et al., 1980; Staubli et al., 1987; Courtiol  
108 and Wilson, 2016; Courtiol et al., 2019), and odor-reward associations (Kawagoe et al., 2007). It is  
109 implicated in the hedonic perception of odors and flavors, as people with lesions of the mediodorsal  
110 thalamus report lower hedonic ratings for experienced odors and odor-taste mixtures (Tham et al., 2011).  
111 Electrophysiological experiments in anesthetized and behaving rats show that neurons in the  
112 mediodorsal thalamus encode odors sampled by sniffing (i.e., orthonasal olfaction) (Courtiol and Wilson,



113 2014) and display odor selectivity during olfactory discrimination tasks (Courtiol and Wilson, 2016).  
114 However, it is unknown how neurons in the mediodorsal thalamus represent orally consumed odors,  
115 tastes, and odor-taste mixtures.

116 To address this question, we recorded single-unit activity in the mediodorsal thalamus of behaving  
117 rats during the intraoral delivery of three different stimulus categories: individual odors, individual tastes,  
118 and odor-taste mixtures. This approach allowed odorized stimuli to be detected via retronasal olfaction,  
119 an essential factor for the perception of flavor (Verhagen and Engelen, 2006; Prescott, 2012), and  
120 ensured that all chemosensory stimuli would share similar somatosensory and attentional attributes  
121 associated with the intraoral delivery of liquids. Our data provide novel insights into how the mediodorsal  
122 thalamus processes chemosensory signals originating from the mouth. Our findings reveal that neurons  
123 in the mediodorsal thalamus encode the sensory and hedonic properties of gustatory stimuli, demonstrate  
124 that chemosensory-evoked activity is rapid and persistent with time-varying differences between  
125 categories of stimuli, and provide evidence that odor-taste mixtures are represented differently from their  
126 unimodal odor and taste components. Together, our results suggest that the mediodorsal thalamus may  
127 be a key node between sensory and higher-order cortical areas for processing chemosensory information  
128 underlying consummatory behavior.

129

130

131

132

133

134

135

136

137

138

139 **Materials and Methods**

140 *Experimental subjects.* All procedures were performed in accordance with university, state, and  
141 federal regulations regarding research animals and were approved by the University of Louisville  
142 Institutional Animal Care and Use Committee. Female Long-Evans rats (~250-350g, Charles Rivers)  
143 were single-housed and maintained on a 12 h light/dark cycle with *ad libitum* food and distilled water  
144 unless specified otherwise.

145 *Surgery and tetrode implantation.* Rats were anesthetized in an isoflurane gas anesthesia induction  
146 chamber with a 5% isoflurane/oxygen mix. Once sedated, rats were removed and placed in an isoflurane  
147 mask. Rats received preoperative injections of buprenorphine HCl (0.05 mg/kg), atropine (0.03 mg/kg),  
148 dexamethasone (0.2 mg/kg), and lactated Ringers solution (5 ml). Once a surgical level of anesthesia  
149 was reached, the scalp was shaved, and the rat was placed into the stereotaxic frame. Depth of  
150 anesthesia was maintained with 1.5-3.5% isoflurane/oxygen mix and monitored every 15 minutes with  
151 inspection of breathing rate, whisking, and toe-pinch withdraw reflex. Ophthalmic ointment was placed  
152 on the eyes and the scalp was swabbed with a povidone-iodine solution then 70% ethanol solution. A  
153 midline incision was made and the skull was cleaned with a 3% hydrogen peroxide solution. Craniotomies  
154 were drilled for the placement of 7 anchoring screws (Microfasteners, SMPPS0002). A craniotomy was  
155 made over the right mediodorsal thalamus (AP: -3.3 mm, ML: 1.4-1.6 mm from bregma) to implant a  
156 movable bundle of 8 tetrodes (Sandvik-Kanthal, PX000004) with a final impedance of ~200-300 k $\Omega$ . The  
157 medial and central portions of the mediodorsal thalamus were targeted due to the dense connectivity with  
158 olfactory and gustatory cortical areas (Price and Slotnick, 1983; Kuroda et al., 1992; Ray and Price, 1992;  
159 Shi and Cassell, 1998; Pelzer et al., 2017). The tetrode bundle was inserted at a 10° angle to avoid the  
160 superior sagittal sinus and lowered to a depth of ~4.7 mm from the brain surface. Ground wires were  
161 secured to multiple anchoring screws. Intraoral cannulas (IOCs) were bilaterally inserted to allow for the  
162 delivery of liquid stimuli directly into the oral cavity. All implants and a head-bolt (for head restraint) were  
163 cemented to the skull with dental acrylic. Injections of analgesic (buprenorphine HCl) were provided for

164 2-3 days post-surgery. Rats were allowed a recovery period of 7-10 days before beginning water  
165 restriction.

166 *Stimulus delivery and recording procedure.* Following recovery from surgery, rats began a water  
167 regulation regime of 1 h access of distilled water per day in the home cage. Next, rats were given 4  
168 consecutive days of 1 h of home cage experience with two odor-taste mixtures: a palatable mixture of  
169 0.01% isoamyl acetate-100 mM sucrose and an unpalatable mixture of 0.01% benzaldehyde-200 mM  
170 citric acid. Rats were then trained to wait calmly in a head restrained position for the delivery of stimuli  
171 through IOCs. All stimuli were mixed with distilled water and delivered via manifolds of polyimide tubes  
172 placed in the IOCs. Stimuli included distilled water, tastes (100 mM sucrose, 100 mM NaCl, 200 mM citric  
173 acid, and 1 mM quinine), odors (0.01% isoamyl acetate, 0.01% benzaldehyde, and 0.01% methyl  
174 valerate), the previously experienced odor-taste mixtures (isoamyl acetate-sucrose and benzaldehyde-  
175 citric acid), and mismatched pairings of those mixtures (isoamyl acetate-citric acid and benzaldehyde-  
176 sucrose). These odors have been used in previous studies investigating orally consumed odors (Aimé et  
177 al., 2007; Julliard et al., 2007; Gautam and Verhagen, 2010, 2012; Tong et al., 2011; Rebello et al., 2015;  
178 Samuelsen and Fontanini, 2017; Bamji-Stocke et al., 2018; Fredericksen et al., 2019; McQueen et al.,  
179 2020). At these concentrations, isoamyl acetate and benzaldehyde lack a gustatory component (Aimé et  
180 al., 2007; Gautam and Verhagen, 2010; Samuelsen and Fontanini, 2017). A trial began with an intertrial  
181 interval of  $20 \pm 5$  s followed by the pseudo-random delivery of ~25-30  $\mu$ l of water, a single taste, a single  
182 odor, or an odor-taste mixture. Each stimulus delivery was followed 5 s later by a ~40  $\mu$ l distilled water  
183 rinse. All recording sessions consisted of a total of 120 trials (i.e., 12 stimuli x 10 trials), except for one  
184 session where a rat received just 9 trials per stimulus. The tetrode bundles were lowered ~160  $\mu$ m after  
185 each recording session and rats were given 1 h access in the home cage to the experienced odor-taste  
186 mixtures of isoamyl acetate-sucrose and benzaldehyde-citric acid. After training days, rats were allowed  
187 1 h access of distilled water in the home cage.

188 *Electrophysiological recordings.* Signals were sampled at 40kHz, digitized, and band-pass filtered  
189 using the Plexon OmniPlex D system (Plexon, RRID:SCR\_014803). Single units were isolated offline

190 using a combination of template algorithms, cluster-cutting, and examination of inter-spike-interval plots  
191 using Offline Sorter (Plexon, Offline Sorter; RRID:SCR\_000012). Data analysis was performed using  
192 Neuroexplorer (Nex Technologies; RRID SCR 001818) and custom written scripts in MATLAB (The  
193 MathWorks, RRID:SCR 001622).

194 *Analysis of single units.* For each neuron, single trial activity and peristimulus time histograms  
195 (PSTHs) were aligned to stimulus presentation through the IOC. Responses were normalized using the  
196 area under the receiver-operating characteristic (auROC) (Cohen et al., 2012; Jezzini et al., 2013;  
197 Gardner and Fontanini, 2014; Samuelsen and Fontanini, 2017). This method normalizes stimulus-evoked  
198 activity to baseline on a 0–1 scale, where 0.5 represents the median of equivalence of the baseline  
199 activity. A score above 0.5 is an excited response and below 0.5 is a suppressed response. Population  
200 PSTHs are the average auROC of each neuron in the observed population. A bin size of 200 ms was  
201 used for all analyses unless otherwise specified. Neurons were defined as ‘chemoselective’ when two  
202 criteria were satisfied: (1) stimulus-evoked activity significantly differed from baseline and (2) there was  
203 a significant difference across the twelve intraoral stimuli. Significant changes from baseline were  
204 detected using a Wilcoxon rank sum test between 2 s baseline (200 ms bins) and 5 s post-stimulus  
205 delivery (200 ms bins) with correction for family-wise error (two consecutive significant bins,  $P < 0.05$ ).  
206 Significant differences evoked by the twelve intraoral stimuli were determined using a two-way ANOVA  
207 (stimulus X time) for 200 ms bins from 0 to 5 s after stimulus delivery. A neuron significantly differed  
208 across the intraoral stimuli when the stimulus main effect or the interaction term (stimulus X time) was  $P$   
209  $< 0.01$ . Proportional analyses were performed using a  $\chi^2$  ( $P < 0.05$ ). Post hoc comparisons were made  
210 using Fisher’s exact test with Dunn–Sidak correction for familywise error.

211 *Excited and suppressed responses.* The average of the auROC normalized activity of the bins that  
212 significantly differed from baseline was used to determine whether the significant responses of  
213 chemoselective neurons were excited or suppressed. Responses whose average significant auROC  
214 score was greater than 0.5 were defined as excited, those with an average significant auROC score less  
215 than 0.5 were defined as suppressed. Comparisons in the time course between non-responses and

216 responses excited or suppressed by chemosensory stimuli were made using the Wilcoxon rank sum test  
217 with correction for family-wise error (two consecutive significant bins,  $P < 0.05$ ). The heat maps (Fig. 3B)  
218 show all the significant responses to each stimulus plotted from the lowest average significant auROC  
219 score (suppressed) to the greatest average significant auROC score (excited). Latency and duration of  
220 the significant responses of chemoselective neurons were determined using a sliding window of 100 ms,  
221 stepped in 20 ms increments until the firing rate was 2.58 standard deviations (99% confidence level)  
222 above or below the average baseline firing rate (2 s before stimulus delivery). Response latency was  
223 determined by the trailing edge of the first significant bin. Response duration was calculated as the total  
224 number of 20 ms bins significantly above (excited) or below (suppressed) the average baseline firing  
225 rate. Overall difference between excited and suppressed response latency and duration were compared  
226 using a two-sample Kolmogorov–Smirnov test ( $P < 0.05$ ). Comparisons of response latency and duration  
227 between stimulus categories were made using the Kruskal-Wallis test corrected with the Tukey HSD test  
228 ( $P < 0.05$ ).

229 *Principal component analysis.* To examine the response dynamics over time, principal component  
230 analyses (PCAs) were performed in MATLAB (The MathWorks, RRID:SCR 001622) on the auROC  
231 normalized activity (-2 to 5 s; 200 ms bins) of the significant responses in each stimulus category  
232 (Narayanan and Laubach, 2009; Liu and Fontanini, 2015). Principal components (PCs) accounting for  
233 more than 5% of the variance were selected and their eigenvectors were used to describe the temporal  
234 dynamics of significant responses to each chemosensory category (Fig. 3C).

235 *Population decoding analysis:* Population decoding analyses were performed using the neural  
236 decoding toolbox (Meyers, 2013). These analyses were used to quantify how populations of neurons in  
237 the mediodorsal thalamus represent different categories of chemosensory signals across time. For each  
238 subpopulation of neurons (e.g. chemoselective neurons vs. non-selective, mixture-selective vs. non-  
239 mixture-selective, and palatability-related vs. non-palatability), a firing rate matrix of the spike time stamps  
240 of each neuron (2 s before and 5 s after) were realigned to stimulus delivery, compiled into 250 ms bins  
241 with a 50 ms step, and normalized to Z score. Three firing rate matrices were made for each

242 subpopulation: (1) water and the three odors, (2) water and the four tastes, and (3) water and the four  
243 odor-taste mixtures. Water was included in each category as a general non-chemosensory stimulus. A  
244 “max correlation coefficient” classifier was used to assess stimulus-related information represented by  
245 the population activity. Matrix activity was divided into 10 “splits”: 9 (training sets) were used by the  
246 classifier algorithm to “learn” the relationship between the pattern of neural activity and the different  
247 stimuli; 1 split (testing set) was used to make predictions about which stimulus was delivered given the  
248 pattern of activity. To compute the classification accuracy, this process was repeated 10 times using  
249 different testing and training sets each time. The classification accuracy is defined as the fraction of trials  
250 during each bin that the classifier correctly predicted the stimulus.

251 *Mixture-selectivity index.* A mixture-selectivity index (MSI) was used to quantify the difference in firing  
252 rate (-2 to 5 s; 200 ms bins) between a neuron’s response to an odor-taste mixture (e.g., isoamyl acetate-  
253 sucrose) and its response to the odor component alone (e.g., isoamyl acetate) and its response to the  
254 taste component alone (e.g., sucrose). This analysis tested 8 mixture-stimulus differences (4 Mixture-  
255 Odor and 4 Mixture-Taste) for each chemoselective neuron (n=85) for a total of 680 mixture-stimulus  
256 responses. A response was considered mixture-selective when the evoked MSI score exceeded the  
257 mean baseline MSI + 6 x standard deviation. The absolute difference in MSI was used to calculate the  
258 average MSI time course (Fig. 5B) to account for the differences between mixtures and components  
259 irrespective of excitation or suppression. Significant changes from baseline in the average MSI time  
260 course were determined using a Wilcoxon rank sum test with correction for family-wise error (two  
261 consecutive significant bins,  $P < 0.05$ ).

262 *Palatability index.* The palatability index (PI) was used to evaluate whether the activity of neurons in  
263 the mediodorsal thalamus represents palatability-related features of tastes (Fontanini et al., 2009; Piette  
264 et al., 2012; Jezzini et al., 2013; Liu and Fontanini, 2015; Samuelsen and Fontanini, 2017; Bouaichi and  
265 Vincis, 2020). This analysis quantifies differences in activity between tastes with similar hedonic values  
266 (sucrose/NaCl, citric acid/quinine) and tastes with opposite hedonic values (sucrose/quinine,  
267 sucrose/citric acid, NaCl/quinine, NaCl/citric acid). To control for differences in firing rates, the auROC

268 normalized activity (-2 to 5 s, 200 ms bins) was used to estimate the differences between taste pairs. The  
269 PI is defined as the difference in the absolute value of the log-likelihood ratio of the auROC normalized  
270 firing rate for taste responses with opposite ( $\langle |LR| \rangle_{\text{opposite}}$ ) and similar ( $\langle |LR| \rangle_{\text{same}}$ ) hedonic values. The  
271 PI is defined as follows ( $\langle |LR| \rangle_{\text{opposite}} - \langle |LR| \rangle_{\text{same}}$ ), where:

$$\begin{aligned} \langle |LR| \rangle_{\text{same}} &= \\ &0.5 \times \left( \left| \ln \frac{\text{sucrose}}{\text{NaCl}} \right| + \left| \ln \frac{\text{quinine}}{\text{citric acid}} \right| \right) \\ \langle |LR| \rangle_{\text{opposite}} &= \\ &0.25 \times \left( \left| \ln \frac{\text{sucrose}}{\text{quinine}} \right| + \left| \ln \frac{\text{sucrose}}{\text{citric acid}} \right| + \left| \ln \frac{\text{NaCl}}{\text{quinine}} \right| + \left| \ln \frac{\text{NaCl}}{\text{citric acid}} \right| \right) \end{aligned}$$

272 A positive PI value indicates that a neuron responds similarly to tastes with similar palatability and  
273 differently to stimuli with opposite hedonic values. A chemoselective neuron was deemed palatability-  
274 related when the evoked PI value was positive and exceeded the mean + 6 X standard deviation of the  
275 baseline. Significant changes from baseline in the average PI time course were determined using a  
276 Wilcoxon rank sum test with correction for family-wise error (two consecutive significant bins,  $P < 0.05$ ).

277 *Histology.* After recordings were completed, rats were anesthetized with ketamine/xylazine/  
278 acepromazine mixture (KXA; 100, 5.2, and 1 mg/kg) and DC current (7  $\mu\text{A}$  for 7 s) was applied to mark  
279 the tetrode locations. Rats were then transcardially perfused with cold phosphate buffer solution followed  
280 by 4% paraformaldehyde (PFA). Brains were extracted, post-fixed in 4% PFA, then incubated in 30%  
281 sucrose. Sections were cut 70  $\mu\text{m}$  thick using a cryostat, mounted, and stained with cresyl violet. Tetrode  
282 placement within the mediodorsal thalamus was required for recording sessions to be included in the  
283 data analysis (see Fig. 1).

284 *Experimental design and statistical analysis.* As with previous head-fixed recording experiments  
285 (Jones et al., 2007; Fontanini et al., 2009; Samuelsen et al., 2012, 2013; Gardner and Fontanini, 2014;  
286 Vincis and Fontanini, 2016; Samuelsen and Fontanini, 2017), only adult female rats were used because  
287 the size and strength of adult male rats significantly increases the risk of catastrophic head-cap failure.  
288 All chemosensory stimuli were delivered pseudo-randomly by custom written MATLAB (MathWorks)  
289 scripts. Experimenters had no control over the order of stimulus delivery. All statistical analyses were

290 performed with GraphPad Prism (GraphPad Software, San Diego, CA) and MATLAB (MathWorks),  
291 including population decoding analyses using the neural decoding toolbox (Meyers, 2013). No statistical  
292 methods were used to predetermine sample sizes, but the number of recorded neurons and animals in  
293 this study are similar to those reported in the field. Significant change from baseline was determined  
294 using a Wilcoxon rank-sum comparison between baseline bin and evoked bins with correction for family-  
295 wise error (two consecutive significant baseline,  $P < 0.05$ ). Significant differences evoked by the twelve  
296 intraoral stimuli were determined using a two-way ANOVA with a Sidak correction for family-wise error  
297 ([stimulus X time], main effect of stimulus,  $P < 0.01$ ). Proportional analyses were performed using a  $\chi^2$   
298 ( $P < 0.05$ ). Post hoc comparisons were made using Fisher's exact test with Dunn–Sidak correction for  
299 familywise error. Kolmogorov–Smirnov (K–S) tests were used to compare distributions of continuous  
300 data. Comparisons of response latency and duration between stimulus categories were made using the  
301 Kruskal-Wallis test with Tukey HSD correction for family-wise error.

302

303

304

305

306

307

308

309

310

311

312

313

314

315



## 316 **Results**

317 Previous electrophysiological studies show that neurons in the mediodorsal thalamus represent the  
318 identity of odors sampled via orthonasal olfaction (Yarita et al., 1980; Imamura et al., 1984; Courtiol and  
319 Wilson, 2014, 2016), but it is unclear how chemosensory signals originating from the mouth are  
320 processed by the mediodorsal thalamus. To determine how neurons in the mediodorsal thalamus  
321 represent different categories of chemosensory stimuli, we recorded single-unit activity during the  
322 intraoral delivery of distilled water, individual odors, individual tastes, and odor-taste mixtures. Figure 1  
323 shows a representative example and a schematic illustration of the dorsal-ventral range of each animal's  
324 recording electrodes in the mediodorsal thalamus. A total of 135 single neurons were recorded from 5  
325 rats across 27 sessions ( $5.4 \pm 0.4$  sessions per rat) with an average yield of  $5.1 \pm 0.9$  neurons per session.  
326

### 327 ***Neurons in the mediodorsal thalamus dynamically represent intraoral chemosensory signals***

328 As a first step to evaluating the neural dynamics evoked by different categories of intraoral  
329 chemosensory stimuli, we identified the population of neurons in the mediodorsal thalamus that respond  
330 differently to odors, tastes, and odor-taste mixtures (i.e., chemoselective). For a neuron to be defined as  
331 'chemoselective', it had to exhibit a significant change from baseline and respond differently across the  
332 intraoral stimuli (see Materials and Methods for details). This double criterion was purposefully stringent  
333 because the intraoral delivery of solutions could introduce potential confounds related to general effects  
334 of somatosensation or attention rather than chemosensory-related activity. We found that 63% (85/135)  
335 of the neurons recorded from the mediodorsal thalamus met both criteria and focused our analyses on  
336 this chemoselective population. Figure 2A shows the chemoselective population's average normalized  
337 response (population PSTHs) to water and the three odors (top), the four tastes (middle), and the four  
338 odor-taste mixtures (bottom). The volatility of the population PSTHs suggested response heterogeneity  
339 between stimuli and across time. These differences in response dynamics are illustrated by two  
340 representative chemoselective neurons in Figure 2B, where activity was excited (Fig. 2B, left) or  
341 suppressed (Fig. 2B, right) by the intraoral delivery of chemosensory stimuli.

342 One possible factor contributing to the volatility in population responses is differences in the number  
343 of neurons that respond to each chemosensory stimulus. We found that most chemoselective neurons  
344 respond to stimuli from all three categories (60.0%, 51/85) with significantly smaller proportions  
345 responding to a single stimulus category (Fisher's exact test,  $P < 0.0001$ ; tastes: 3.5%, 3/85; odors: 2.4%,  
346 2/85; odor-taste mixtures: 7.1%, 6/85) or to two stimulus categories (Fisher's exact test,  $P < 0.0001$ ;  
347 tastes and odor-taste mixtures: 17.6%, 15/85; odors and odor-taste mixtures: 8.2%, 7/85; tastes and  
348 odors: 1.2%, 1/85). Next, we examined the proportion of chemoselective neurons that responded to each  
349 chemosensory stimulus. Figure 2C shows the distribution of neurons that responded to water and each  
350 of the three odors (Fig. 2C, top), the four tastes (Fig. 2C, middle), and the four odor-taste mixtures (Fig.  
351 2C, bottom). Overall, there was a significant difference in the proportion of neurons responding to the  
352 various stimuli ( $\chi^2 (11) = 56.99$ ,  $P < 0.0001$ ). To determine whether chemosensory stimuli activated  
353 different proportions of chemoselective neurons, we compared the proportion responding to water (a non-  
354 chemosensory stimulus) to the proportion responding to each chemosensory stimulus. Compared to  
355 water (34.2%, 29/85), significantly greater proportions of chemoselective neurons responded to citric acid  
356 (65.9%, 56/85; Fisher's exact test,  $P < 0.001$ ) and each of the odor-taste mixtures: isoamyl acetate-  
357 sucrose (57.6%, 49/85; Fisher's exact test,  $P = 0.01$ ), benzaldehyde-citric acid (64.7%, 55/85; Fisher's  
358 exact test,  $P < 0.001$ ), isoamyl acetate-citric acid (65.9%, 56/85; Fisher's exact test,  $P < 0.001$ ), and  
359 benzaldehyde-sucrose (56.5%, 48/85; Fisher's exact test,  $P < 0.01$ ). Analysis of the distribution of  
360 neurons that responded to chemosensory stimuli within each category (Fig. 2C) showed no difference in  
361 the proportion of neurons responding within the odor category ( $\chi^2 (2) = 0.028$ ,  $P = 0.986$ ) or odor-taste  
362 mixture category ( $\chi^2 (3) = 2.477$ ,  $P = 0.480$ ), but showed a significant difference across the taste stimuli  
363 ( $\chi^2 (3) = 22.38$ ,  $P < 0.001$ ). Post-hoc analyses showed that significantly more neurons responded to citric  
364 acid (65.9%, 56/85) than sucrose (38.8%, 33/85; Fisher's exact test,  $P < 0.001$ ) or salt (31.7%, 27/85;  
365 Fisher's exact test,  $P < 0.001$ ), but not quinine (48.2%, 41/85; Fisher's exact test,  $P > 0.05$ ).

366 Next, we determined the tuning properties of the chemoselective neurons and found that the greatest  
367 proportion responded to at least one odor-taste mixture (92.9%, 79/85), followed by at least one taste

368 (82.4%, 70/85), and then at least one odor (71.8%, 61/85). We then evaluated the tuning profiles of  
369 chemoselective neurons within each stimulus category to determine the proportion of neurons that  
370 responded to only a single stimulus (i.e., narrowly-tuned) or multiple stimuli (i.e., broadly-tuned). We  
371 found that a significantly higher proportion of chemoselective neurons responded to multiple tastes and  
372 odor-taste mixtures, but not multiple odor stimuli (Figure 2D). There was no difference in the proportion  
373 of chemoselective neurons that did not respond to odors (28.2%, 24/85), responded to a single odor  
374 (31.8%, 27/85), or responded to multiple odors (40.0%, 34/85) ( $\chi^2(2) = 2.788$ ,  $P = 0.25$ ) (Fig. 2D, top).  
375 Also, there was no difference between the proportion of neurons that responded to only a single odor  
376 (31.8%, 27/85), just two odors (21.2%, 18/85), or to all three odors (18.8%, 16/85;  $\chi^2(2) = 4.439$ ,  $P =$   
377 0.11). A greater proportion of chemoselective neurons responded to multiple taste stimuli (55.3%, 47/85)  
378 compared to those that responded to only a single taste (27.1%, 23/85; Fisher's exact test,  $P < 0.001$ ) or  
379 did not respond to tastes (17.6%, 15/85; Fisher's exact test,  $P < 0.001$ ) (Fig. 2D, middle). However, there  
380 was no difference between the proportion of neurons responding to just one taste (27.1%, 23/85), two  
381 tastes (24.7%, 21/85), three tastes (14.1%, 12/85), or all four tastes (16.5%, 14/85;  $\chi^2(3) = 6.116$ ,  $P =$   
382 0.11). A greater proportion of chemoselective neurons responded to multiple odor-taste mixtures (77.6%,  
383 66/85) compared to those that responded to only a single odor-taste mixture (15.3%, 13/85; Fisher's  
384 exact test,  $P < 0.001$ ) or did not respond to mixtures (7.1%, 6/85; Fisher's exact test,  $P < 0.001$ ) (Fig. 2D,  
385 bottom). There was no difference between the proportion of neurons responding to just one odor-taste  
386 mixture (15.3%, 13/85), two mixtures (30.6%, 26/85), three mixtures (20.0%, 17/85), or all four mixtures  
387 (27.1%, 23/85;  $\chi^2(3) = 5.128$ ,  $P = 0.16$ ). Together, these analyses revealed that most neurons in the  
388 mediodorsal thalamus are broadly-tuned and selectively represent unimodal and multimodal  
389 chemosensory signals, indicating that individual neurons process sensory information across a range of  
390 chemosensory stimuli.

391

392

393

394 ***Temporal processing of chemosensory signals by the mediodorsal thalamus***

395 Chemosensory processing in the olfactory and gustatory system is characterized by dynamic and  
396 time-varying modulations in activity (Katz et al., 2001; Fontanini et al., 2009; Maier et al., 2012;  
397 Samuelsen et al., 2012, 2013; Liu and Fontanini, 2015; Maier, 2017; Samuelsen and Fontanini, 2017).  
398 While most of these areas primarily respond with excitation to chemosensory stimuli, a study by Liu and  
399 Fontanini (2015) examining another thalamic nucleus, the gustatory thalamus (i.e., the parvocellular  
400 portion of the ventroposteromedial nucleus, VPMpc), revealed a near balance between taste-evoked  
401 excitation and suppression. Therefore, our first step in examining the neural dynamics of chemosensory-  
402 evoked activity in the mediodorsal thalamus was to sort responses into excited responses (when the  
403 significant evoked activity was greater than baseline), suppressed responses (when the significant  
404 evoked activity was less than the baseline), and non-responsive (those that did not significantly differ  
405 from baseline). The population averages of excited and suppressed responses (Fig. 3A) and the heat  
406 maps of each significant response (Fig. 3B) to odors (top), tastes (middle), and odor-taste mixtures  
407 (bottom) illustrate the heterogeneity of responses across the chemoselective population. Although  
408 chemosensory stimuli more often evoked excitation (27.2%, 254/935) than suppression (23.7%,  
409 222/935), there was no significant difference in the overall proportion of responses excited or suppressed  
410 by the different chemosensory stimuli (Fisher's exact test,  $P = 0.0998$ ). This equivalence in stimulus-  
411 evoked excitation and suppression was represented within each stimulus category. There was no  
412 difference in the proportion of odor responses that evoked excitation (23.5%, 60/255) or suppression  
413 (20.0%, 51/255; Fisher's exact test,  $P = 0.391$ ), in taste responses that evoked excitation (24.1%, 82/340)  
414 or suppression (22.1%, 75/340; Fisher's exact test,  $P = 0.585$ ), or odor-taste mixture responses that  
415 evoked excitation (32.9%, 112/340) or suppression (28.2%, 96/340; Fisher's exact test,  $P = 0.212$ ).

416 Analysis of the distribution in response latency revealed differences in the onset of excited and  
417 suppressed activity. Overall, the onset of responses suppressed by chemosensory stimuli ( $301.7 \pm 30.1$   
418 ms) occurred significantly faster than the onset of excitation ( $443.9 \pm 45.0$  ms; two-sample Kolmogorov-  
419 Smirnov test, K-S stat = 0.23,  $P < 0.001$ ). While there was no difference between the onset of excited

420 responses between the stimulus categories (odors:  $443.4 \pm 82.8$  ms, tastes:  $471.6 \pm 90.3$  ms, odor-taste  
421 mixtures:  $426.0 \pm 65.5$  ms; Kruskal-Wallis,  $H(2) = 0.1080$ ,  $P = 0.948$ ), this analysis revealed a significant  
422 difference between stimulus categories for the onset of suppression (Kruskal-Wallis,  $H(2) = 8.9704$ ,  $P =$   
423  $0.011$ ). Tukey's HSD Test for multiple comparisons showed that onset of suppression occurred  
424 significantly faster with the intraoral delivery of odor stimuli ( $156.1 \pm 36.1$  ms) compared to either tastes  
425 ( $341.0 \pm 55.8$  ms,  $P = 0.033$ ) or odor-taste mixtures ( $349.2 \pm 49.5$  ms,  $P = 0.012$ ).

426 To better understand the temporal profiles of the chemosensory-evoked activity, we performed a PCA  
427 on the auROC normalized activity (-2 to 5s; 200 ms bins) of the significant responses in each stimulus  
428 category to extract the most frequent trends in the time course of responses (Narayanan and Laubach,  
429 2009; Liu and Fontanini, 2015) (Fig. 3C). The first three principal components (PCs) accounted for nearly  
430 the same total variance of responses to odors (65.8%), tastes (66.9%), and odor-taste mixtures (68%).  
431 Furthermore, the responses represented by the three largest eigenvectors were the same across the  
432 stimulus categories; where PC 1 represents a monotonic component that lasted the entire 5 s temporal  
433 window, PC 2 represents a biphasic component, and PC 3 represents triphasic modulations.

434 Next, we determined the duration of activity that was significantly greater than baseline (a measure  
435 of total excitation) or significantly lower than baseline (a measure of total suppression) differed by stimulus  
436 category. This analysis identifies each significant bin over time to account for the heterogeneity of  
437 biphasic and triphasic evoked responses (Fig. 3C). Overall, the excited activity lasted significantly longer  
438 ( $716.2 \pm 34.7$  ms) compared to responses suppressed by chemosensory stimuli ( $477.2 \pm 27.5$  ms; two-  
439 sample Kolmogorov–Smirnov test, K-S stat = 0.21,  $P < 0.001$ ). However, there were no differences  
440 between stimulus categories in the duration of either excited activity (odors:  $737.1 \pm 74.5$  ms, tastes:  
441  $742.6 \pm 60.3$  ms, mixtures:  $685.0 \pm 51.7$  ms; Kruskal-Wallis,  $H(2) = 0.3723$ ,  $P = 0.8301$ ) or suppressed  
442 activity (odors:  $528.2 \pm 59.2$  ms, tastes:  $488.6 \pm 49.9$  ms, mixtures:  $441.6 \pm 39.3$  ms; Kruskal-Wallis,  $H$   
443  $(2) = 1.4805$ ,  $P = 0.4770$ ). In summary, neurons were suppressed by stimuli more quickly, especially in  
444 response to odors, but responded with excitation significantly longer than they were suppressed.

445 While the activity of individual neurons can represent specific features of chemosensory stimuli,

446 networks of neurons are responsible for integrating and processing that information to guide behavior.  
447 We hypothesized that the heterogeneity displayed by the population of chemoselective neurons enables  
448 the accurate representation of the various chemosensory stimuli across time. We used a population  
449 decoding analysis (Jezzini et al., 2013; Liu and Fontanini, 2015; Bouaichi and Vincis, 2020) to quantify  
450 whether the firing patterns of ensembles of chemoselective neurons in the mediodorsal thalamus  
451 accurately encodes stimulus identity over time. We computed the decoding performance of the population  
452 of chemoselective neurons (n=85) and non-selective neurons (n=50) for the three categories of  
453 chemosensory stimuli (Fig. 4). Water was included in the population decoding analysis for each of the  
454 three chemosensory categories as a general non-chemosensory stimulus. Figure 4A shows the time  
455 course of the classification accuracy for odors and water. Odor decoding of the chemoselective  
456 population activity showed an early onset (classification above chance from the first bin after intraoral  
457 delivery) before peaking 1 s after odor delivery. The classification accuracy briefly returns to chance level  
458 ~3.75 s after stimulus delivery and then moves above chance for the remaining temporal window. The  
459 odor classification accuracy of the non-selective neurons only exceeded chance for a single bin at 2 s.  
460 Figure 4B shows the time course of the classification accuracy for tastes and water. Taste decoding of  
461 the chemoselective population activity did not perform above chance until the second bin (~500 ms),  
462 peaked at 1.5 s after intraoral delivery, and remained above chance for the entire 5 s time frame. The  
463 taste classification accuracy of the non-selective neurons never exceeded chance. Figure 4C shows the  
464 time course of classification accuracy for odor-taste mixtures and water. Like the decoding performance  
465 of odors, the odor-taste mixture decoding of the chemoselective population activity showed an early onset  
466 (first bin, ~250 ms). The odor-taste mixture classification accuracy peaked 1.25 s after intraoral delivery,  
467 slightly after the peak for odors, but before the peak for tastes. Like the decoding performance of tastes,  
468 the classification accuracy stayed above chance for the entire 5 s time frame. The odor-taste mixture  
469 classification accuracy of the non-selective neurons did not exceed chance but for a single bin at 1.75 s.  
470 The decoding performance for odor-taste mixtures is particularly interesting because the four odor-taste  
471 mixtures are combinations of just two tastes (sucrose and citric acid) and two odors (isoamyl acetate and

472 benzaldehyde). Together, these data indicate that ensembles of neurons in the mediodorsal thalamus  
473 reliably encode unimodal and multimodal chemosensory signals.

474

475 ***A subset of chemoselective neurons represents mixtures differently from its components***

476 Although most chemoselective neurons respond to odor-taste mixtures, they could be responding to  
477 the odor or taste component of the mixture. If so, one would expect that the activity evoked by an odor-  
478 taste mixture to be similar to the response elicited by its odor or taste component alone. Visual inspection  
479 of the raster plots and PSTHs of individual neurons in the mediodorsal thalamus indicated that some  
480 responded differently to odor-taste mixtures compared to their individual odor or taste components (Fig.  
481 5A). We used a mixture-selectivity index (MSI) (see Materials and Methods for details) to examine  
482 whether neurons in the mediodorsal thalamus respond to odor-taste mixtures differently than to their  
483 unimodal components. This analysis quantifies the difference in firing rate across time between a  
484 neuron's response to an odor-taste mixture (e.g., isoamyl acetate-sucrose) and the response to its odor  
485 component alone (e.g., isoamyl acetate) or its taste component alone (e.g., sucrose). A response was  
486 considered significantly different when the evoked MSI score exceeded the mean baseline MSI + 6 x  
487 standard deviation.

488 The MSI analysis revealed that nearly a third of the odor-taste mixture responses (32.8%, 168/680)  
489 differed from at least one of its components. These 168 mixture-selective responses could be  
490 represented by as few as 21 neurons or they could be spread across the entire chemoselective population  
491 because each neuron could account for a maximum of 8 mixture-selective responses (each of the 4 odor-  
492 taste mixtures compared to their odor and taste component). However, we found that 53 of the 85 (62.4%)  
493 chemoselective neurons accounted for the mixture-selective responses. Of the 53 neurons, 21 (39.6%,  
494 21/53) had odor-taste mixture responses that differed from odor and taste responses, 23 (43.4%, 23/53)  
495 differed from just odor responses, and 9 (17.0%, 9/53) differed from just taste responses. To examine  
496 these differences over time, we calculated the average absolute difference in MSI (-2 to 5s; 200 ms bins)  
497 for both the mixture-selective and non-mixture-selective responses (Fig. 5B). The absolute difference in



498 MSI was used to account for differences between odor-taste mixtures and components irrespective of  
499 excitation or suppression. This analysis revealed that the mixture-selective responses began to  
500 significantly differ from baseline 600 ms after stimulus delivery, peaked at 800 ms, and remained  
501 significantly above baseline for another 2.2 s (green line, black bar, Wilcoxon rank-sum, two consecutive  
502 significant bins,  $P < 0.05$ ). As a control, the absolute value of the MSI was calculated for the non-mixture-  
503 selective responses. There was no difference from baseline (black line,  $P > 0.05$ ).

504 Next, we used the population decoding analysis to quantify the contribution of the ensemble of  
505 mixture-selective neurons to the representation of chemosensory stimuli over time. Figure 5 shows the  
506 decoding performance of the population of mixture-selective neurons ( $n=53$ ) and the non-mixture-  
507 selective neurons ( $n=32$ ) for the three categories of chemosensory stimuli. Importantly, both groups had  
508 decoding performances above chance but with different temporal profiles. The decoding of the mixture-  
509 selective population activity showed an early onset, with classification accuracy above chance from the  
510 first bin, for all three chemosensory categories. While classification accuracy of the non-mixture-selective  
511 population did not exceed chance until 500ms for tastes (Fig. 5B) and odor-taste mixtures (Fig. 5C), and  
512 750 ms for odors (Fig. 5A). Although the classification accuracy of both groups remained above chance  
513 when decoding tastes and odor-taste mixtures, the decoding performance for odors differed between the  
514 mixture-selective and non-mixture-selective populations. The classification accuracy of the mixture-  
515 selective neurons remained above chance for the entire period, but the classification accuracy of the non-  
516 mixture-selective population returned to chance 2 s after odor delivery (Fig. 5A). These results suggest  
517 that differences between odor-taste mixtures and their unimodal components are distributed across the  
518 population of chemoselective neurons in the mediodorsal thalamus.

### 519 520 ***A subset of chemoselective neurons represents taste palatability***

521 Tastes have intrinsic values, with rodents consuming palatable tastes and avoiding unpalatable ones.  
522 It is well established that brain regions important for chemosensory processing and feeding-related  
523 behaviors represent the chemical and hedonic properties of tastes (Fontanini et al., 2009; Piette et al.,



524 2012; Sadacca et al., 2012; Jezzini et al., 2013; Li et al., 2013; Liu and Fontanini, 2015; Samuelsen and  
525 Fontanini, 2017). However, its unknown whether the activity in the mediodorsal thalamus represents taste  
526 palatability, meaning that tastes belonging to similar hedonic categories evoke similar responses (e.g.,  
527 sucrose/NaCl vs. citric acid/quinine). Therefore, we calculated a palatability index (PI) (see Materials and  
528 Methods for details) to determine whether neurons in the mediodorsal thalamus represent palatability-  
529 related features of tastes. This analysis quantifies the differences in activity between tastes of similar  
530 palatability (sucrose/NaCl, citric acid/quinine) and tastes of opposite palatability (sucrose/quinine,  
531 sucrose/citric acid, NaCl/quinine, NaCl/citric acid). A chemoselective neuron was considered to represent  
532 taste palatability when it had a positive PI value (it responded similarly to tastes with similar hedonic value  
533 but differently to tastes with opposite hedonic value) and the evoked PI value exceeded the mean + 6 x  
534 standard deviation of the baseline.

535 This analysis revealed that the activity of more than a quarter (27.1%, 23/85) of the chemoselective  
536 neurons represented taste palatability (Fig. 6A, representative examples). The average PI value (-2 to  
537 5s; 200 ms bins) of the palatability-related ( $n = 23$ ) and non-palatability neuron populations ( $n = 62$ ) was  
538 used to examine the temporal evolution of palatability-related activity. Figure 6B shows that the mean PI  
539 value of the palatability-related neurons began to significantly differ from baseline beginning at 1.4 s and  
540 peaked 2 s after stimulus delivery (green line, black bars, Wilcoxon rank-sum, two consecutive significant  
541 bins,  $P < 0.05$ ). The mean response of the non-palatability population did not differ from baseline (black  
542 line,  $P > 0.05$ ).

543 It is possible that this palatability-related population of chemoselective neurons primarily represents  
544 taste signals and does not carry information relative to odors or odor-taste mixtures. Therefore, a  
545 population decoding analysis was used to examine how the palatability-related population represents the  
546 different categories of chemosensory stimuli (Fig. 6C-E). While both populations performed better than  
547 chance for all three categories, this analysis revealed categorical and temporal differences between the  
548 palatability-related and the non-palatability chemoselective populations. The palatability-related neurons  
549 represented taste information better than the non-palatability chemoselective population, but during a

550 specific temporal window (0.5-2.25 s). The opposite occurred with odors and odor-taste mixtures; the  
551 non-palatability chemoselective population performed better than palatability-related neurons for a brief  
552 period for both the odors (0.5-1 s) and odor-taste mixtures (0.5-1.25 s). These results indicate that a  
553 subset of chemoselective neurons in the mediodorsal thalamus encode the hedonic properties of tastes.  
554 However, this population is multidimensional and represents odors and odor-taste mixtures as well.

555 Taken together, our results show that neurons in the mediodorsal thalamus represent the sensory  
556 properties of odors, tastes, and odor-taste mixtures with information relative to mixture-selectivity and  
557 taste palatability represented by the neural activity. These findings suggest that neurons in the  
558 mediodorsal thalamus are capable of representing the sensory and hedonic properties of unimodal and  
559 multimodal chemosensory stimuli important for making decisions about food.

560

561

562

563

564

565

566

567

568

569

570

571

572

573

574

575

576 **Discussion**

577 Higher-order thalamic areas are thought to modulate, synchronize, and transmit behaviorally relevant  
578 information between sensory and higher-order cortical areas (Theyel et al., 2010; Saalman et al., 2012;  
579 Stroh et al., 2013; Mease et al., 2016; Zhou et al., 2016; Schmitt et al., 2017; Rikhye et al., 2018). By  
580 sustaining communication across cortical regions, these cortico-thalamo-cortical (i.e., transthalamic)  
581 circuits separate potentially overlapping information and enable rapid behavioral changes based on  
582 environmental demands (Saalman, 2014; Sherman, 2016; Rikhye et al., 2018). Given its connectivity,  
583 the mediodorsal thalamus may perform a similar function by communicating behaviorally-relevant  
584 chemosensory information between principal regions of the olfactory and gustatory systems and higher-  
585 order cortical areas (Price and Slotnick, 1983; Kuroda et al., 1992; Ray and Price, 1992; Shi and Cassell,  
586 1998; Kuramoto et al., 2017; Pelzer et al., 2017). The results presented here are the first to demonstrate  
587 how neurons in the mediodorsal thalamus represent olfactory and gustatory signals originating from the  
588 mouth. Tetrode recordings in behaving rats revealed that most neurons in the mediodorsal thalamus  
589 dynamically represent intraoral odors, tastes, and odor-taste mixtures. These chemoselective neurons  
590 responded broadly across intraoral stimuli with time-varying multiphasic changes in activity split between  
591 excitation and suppression. Population analyses revealed temporal differences in responses to  
592 chemosensory stimuli, where chemoselective neurons responded to odors and odor-taste mixtures more  
593 quickly than tastes, but sustained responses to tastes and odor-taste mixtures longer than odors.  
594 Analyses of the temporal sequence of mixture-selectivity and taste palatability revealed that information  
595 related to chemical identity is represented before taste palatability. Our results further demonstrate the  
596 multidimensionality of the mediodorsal thalamus and provides additional evidence of its involvement in  
597 processing chemosensory information important for consummatory behaviors.

598 Similar to the findings of electrophysiological studies of the gustatory thalamus (Liu and Fontanini,  
599 2015), basolateral amygdala (Fontanini et al., 2009), piriform cortex (Maier et al., 2012; Maier, 2017),  
600 gustatory cortex (Katz et al., 2001; Samuelsen et al., 2012, 2013; Samuelsen and Fontanini, 2017), and  
601 medial prefrontal cortex (Jezzini et al., 2013), chemosensory processing by the mediodorsal thalamus is

602 characterized by dynamic and time-varying modulations in activity. We found that 63% of recorded  
603 neurons responded selectively to passively delivered intraoral stimuli, with similar proportions of this  
604 chemoselective population responding to odors, tastes, and odor-taste mixtures. Analysis of the breadth  
605 of tuning revealed that chemoselective neurons responded broadly to tastes and odor-taste mixtures, but  
606 44% of odor-responsive neurons responded to just a single odor. Previous electrophysiological studies  
607 report varying degrees of odor specificity in the mediodorsal thalamus. For example, recordings in  
608 anesthetized rabbits showed that 24% of neurons responded to a single orthonasal odor (Imamura et al.,  
609 1984), while recordings in anesthetized rats found that 63% of neurons responded to a single orthonasal  
610 odor (Courtiol and Wilson, 2014). These findings suggest that the degree of odor specificity in the  
611 mediodorsal thalamus likely depends on a variety of factors, including the size of the odor set, route of  
612 delivery, and state of the animal.

613 It is well established that neurons in the mediodorsal thalamus respond to visual, auditory,  
614 somatosensory, and olfactory stimuli (Yarita et al., 1980; Imamura et al., 1984; Oyoshi et al., 1996; Yang  
615 et al., 2006; Courtiol and Wilson, 2016), but, to the best of our knowledge, only one study has provided  
616 evidence of taste-evoked activity in the mediodorsal thalamus. Oyoshi and colleagues (1996) showed  
617 that neurons respond to sucrose when it was given as a reward for the correct choice in a sensory-  
618 discrimination task. However, given the complex nature of the task design, it is unclear whether  
619 responses were somatosensory-, reward-, or taste-dependent. The results presented here clearly  
620 demonstrate that neurons in the mediodorsal thalamus represent the sensory and hedonic properties of  
621 taste stimuli. Additionally, our findings reveal that intraoral olfactory and gustatory signals converge onto  
622 individual neurons in the mediodorsal thalamus. Convergence of chemosensory signals is not unique to  
623 the mediodorsal thalamus as the piriform cortex and gustatory cortex are known to respond to both odor  
624 and taste stimuli (Maier et al., 2012; Maier, 2017; Samuelson and Fontanini, 2017). However, the  
625 convergence of olfactory and gustatory signals in the mediodorsal thalamus may be specific to the  
626 chemosensory modalities, since previous studies found that odor-responsive neurons did not respond to

627 other sensory modalities, (e.g., visual, auditory, or somatosensory stimuli) (Yarita et al., 1980; Imamura  
628 et al., 1984).

629 To challenge multimodal chemosensory processing by the mediodorsal thalamus, we chose to use a  
630 four odor-taste mixture set comprised of just two tastes (sucrose and citric acid) and two odors (isoamyl  
631 acetate and benzaldehyde). If neurons primarily represented either unimodal odor or taste signals, the  
632 neural decoder would be unable to distinguish between mixtures containing the same odor or the same  
633 taste. The population decoding performance showed that chemoselective neurons accurately classified  
634 odors, tastes, and odor-taste mixtures, suggesting that they differently encode unimodal and multimodal  
635 chemosensory stimuli. This was confirmed using a mixture-selectivity analysis, which showed that most  
636 chemoselective neurons respond differently to odor-taste mixtures and their individual components  
637 beginning ~600ms after stimulus delivery. Taken together, our findings demonstrate that neurons in the  
638 mediodorsal thalamus dynamically represent unimodal and multimodal gustatory and olfactory stimuli  
639 originating from the mouth.

640 While identifying the sources of chemosensory information to the mediodorsal thalamus is outside  
641 the scope of this study, analysis of the temporal dynamics of thalamic activity indicates likely sources of  
642 input. The thalamic representation of chemosensory information is rapid and persistent, but with time-  
643 varying differences between categories of stimuli. Our results show that the mediodorsal thalamus  
644 encodes the chemical identity of stimuli containing odors (odors and odor-taste mixtures) ~250 ms after  
645 intraoral delivery but takes an additional ~250 ms to encode the identity of tastes alone. However, both  
646 the piriform cortex and gustatory cortex encode chemical identity well before the mediodorsal thalamus.  
647 For example, neurons in the piriform cortex accurately represent odor identity ~100 ms after inhalation  
648 (Bolding and Franks, 2017), while neurons in the gustatory cortex encode taste identity ~175-250 ms  
649 (Katz et al., 2001; Jezzini et al., 2013; Bouaichi and Vincis, 2020). On the other hand, higher-order cortical  
650 areas like the medial prefrontal cortex do not encode taste identity until ~575 ms after intraoral delivery  
651 (Jezzini et al., 2013), much later than the mediodorsal thalamus. These findings suggest a mechanism  
652 whereby the mediodorsal thalamus initially receives chemosensory information from the piriform cortex

653 and gustatory cortex, while dynamic multiphasic activity arises via recurrent interactions with the  
654 chemosensory cortices and higher-order cortical areas. This transthalamic circuit could act as a means  
655 for large-scale integration of chemosensory information across multiple cortical circuits (Saalman,  
656 2014).

657 Similar network interactions may be responsible for the hedonic representation of tastes by the  
658 mediodorsal thalamus. Based on connectivity, the basolateral amygdala and gustatory cortex are the  
659 most likely sources of hedonic information to the mediodorsal thalamus. Both areas are densely  
660 reciprocally connected with the mediodorsal thalamus and represent taste palatability before the  
661 mediodorsal thalamus. The basolateral amygdala encodes taste palatability between ~0.25–1.0 s after  
662 taste delivery (Fontanini et al., 2009), while the gustatory cortex doesn't begin to represent taste  
663 palatability until ~0.75-1.0 s (Katz et al., 2001; Jezzini et al., 2013; Samuelsen and Fontanini, 2017). The  
664 palatability index time course (Fig. 6) suggests multiple periods of hedonic processing in the mediodorsal  
665 thalamus that overlap ~1.5 s after stimulus delivery. The temporal variations in hedonic processing by  
666 the mediodorsal thalamus may arise from contributions by the basolateral amygdala to the initial ramp  
667 and the gustatory cortex modulating and sustaining palatability-related information. These hypotheses  
668 require future studies selectively targeting neuronal populations with cell-specific viral manipulations  
669 (e.g., optogenetics) to elucidate the contribution of these regions to chemosensory processing by the  
670 mediodorsal thalamus.

671 In summary, despite its robust connectivity with olfactory and gustatory areas, involvement in  
672 olfactory-dependent behaviors, and importance for the perception of flavors, the mediodorsal thalamus  
673 remains an understudied area of the network that processes chemosensory information. Our results show  
674 that neurons in the mediodorsal thalamus dynamically encode the sensory and hedonic properties of  
675 chemosensory signals originating from the mouth. Future studies probing cortico-thalamo-cortical  
676 interactions in behaving animals are necessary to determine the contribution of the mediodorsal thalamus  
677 for chemosensory-dependent behaviors.

678

679 **References**

- 680 Aimé P, Duchamp-Viret P, Chaput MA, Savigner A, Mahfouz M, Julliard AK (2007) Fasting increases  
681 and satiation decreases olfactory detection for a neutral odor in rats. *Behav Brain Res* 179:258–  
682 264.
- 683 Alcaraz F, Fresno V, Marchand AR, Kremer EJ, Coutureau E, Wolff M (2018) Thalamocortical and  
684 corticothalamic pathways differentially contribute to goal-directed behaviors in the rat. *Elife* 7.
- 685 Bamji-Stocke S, Biggs BT, Samuelson CL (2018) Experience-dependent c-Fos expression in the  
686 primary chemosensory cortices of the rat. *Brain Res* 1701:189–195.
- 687 Bolding KA, Franks KM (2017) Complementary codes for odor identity and intensity in olfactory cortex.  
688 *Elife* 6.
- 689 Bolkan SS, Stujenske JM, Parnaudeau S, Spellman TJ, Rauffenbart C, Abbas AI, Harris AZ, Gordon  
690 JA, Kellendonk C (2017) Thalamic projections sustain prefrontal activity during working memory  
691 maintenance. *Nat Neurosci* 20.
- 692 Bouaichi CG, Vincis R (2020) Cortical processing of chemosensory and hedonic features of taste in  
693 active licking mice. *J Neurophysiol* 123:1995–2009.
- 694 Courtiol E, Neiman M, Fleming G, Teixeira CM, Wilson DA (2019) A specific olfactory cortico-thalamic  
695 pathway contributing to sampling performance during odor reversal learning. *Brain Struct Funct*  
696 224.
- 697 Courtiol E, Wilson DA (2014) Thalamic olfaction: characterizing odor processing in the mediodorsal  
698 thalamus of the rat. *J Neurophysiol* 111:1274–1285.
- 699 Courtiol E, Wilson DA (2016) Neural Representation of Odor-Guided Behavior in the Rat Olfactory  
700 Thalamus. *J Neurosci* 36:5946–5960.
- 701 Eichenbaum H, Shedlack KJ, Eckmann KW (1980) Thalamocortical mechanisms in odor-guided  
702 behavior: I. Effects of lesions of the mediodorsal thalamic nucleus and frontal cortex on olfactory  
703 discrimination in the rat. *Brain Behav Evol* 17:255–275.
- 704 Fanselow MS, Birk J (1982) Flavor-flavor associations induce hedonic shifts in taste preference. *Anim*

- 705 Learn Behav 10:223–228.
- 706 Fontanini A, Grossman SE, Figueroa JA, Katz DB (2009) Distinct Subtypes of Basolateral Amygdala  
707 Taste Neurons Reflect Palatability and Reward. *J Neurosci* 29:2486–2495.
- 708 Fredericksen KE, McQueen KA, Samuelsen CL (2019) Experience-Dependent c-Fos Expression in the  
709 Mediodorsal Thalamus Varies with Chemosensory Modality. *Chem Senses* 44:41–49.
- 710 Gardner MPH, Fontanini A (2014) Encoding and Tracking of Outcome-Specific Expectancy in the  
711 Gustatory Cortex of Alert Rats. *J Neurosci* 34:13000–13017.
- 712 Gautam SH, Verhagen J V. (2010) Evidence that the sweetness of odors depends on experience in  
713 rats. *Chem Senses* 35:767–776.
- 714 Gautam SH, Verhagen J V. (2012) Direct Behavioral Evidence for Retronasal Olfaction in Rats. *PLoS*  
715 *One* 7.
- 716 Green BG, Nachtigal D, Hammond S, Lim J (2012) Enhancement of retronasal odors by taste. *Chem*  
717 *Senses* 37:77–86.
- 718 Imamura K, Onoda N, Takagi SF (1984) Odor response characteristics of thalamic mediodorsal  
719 nucleus neurons in the rabbit. *Jpn J Physiol* 34:55–73.
- 720 Jezzini A, Mazzucato L, La Camera G, Fontanini A (2013) Processing of Hedonic and Chemosensory  
721 Features of Taste in Medial Prefrontal and Insular Networks. *J Neurosci* 33:18966–18978.
- 722 Jones LM, Fontanini A, Sadacca BF, Miller P, Katz DB (2007) Natural stimuli evoke dynamic  
723 sequences of states in sensory cortical ensembles. *Proc Natl Acad Sci U S A* 104:18772–18777.
- 724 Julliard AK, Chaput MA, Apfelbaum A, Aimé P, Mahfouz M, Duchamp-Viret P (2007) Changes in rat  
725 olfactory detection performance induced by orexin and leptin mimicking fasting and satiation.  
726 *Behav Brain Res* 183:123–129.
- 727 Katz DB, Simon SA, Nicolelis MAL (2001) Dynamic and multimodal responses of gustatory cortical  
728 neurons in awake rats. *J Neurosci* 21:4478–4489.
- 729 Kawagoe T, Tamura R, Uwano T, Asahi T, Nishijo H, Eifuku S, Ono T (2007) Neural correlates of  
730 stimulus-reward association in the rat mediodorsal thalamus. *Neuroreport* 18:683–688.



- 731 Kuramoto E, Pan S, Furuta T, Tanaka YR, Iwai H, Yamanaka A, Ohno S, Kaneko T, Goto T, Hioki H  
732 (2017) Individual mediodorsal thalamic neurons project to multiple areas of the rat prefrontal  
733 cortex: A single neuron-tracing study using virus vectors. *J Comp Neurol* 525:166–185.
- 734 Kuroda M, Murakami K, Kishi K, Price JL (1992) Distribution of the piriform cortical terminals to cells in  
735 the central segment of the mediodorsal thalamic nucleus of the rat. *Brain Res* 595:159–163.
- 736 Li JX, Yoshida T, Monk KJ, Katz DB (2013) Lateral Hypothalamus Contains Two Types of Palatability-  
737 Related Taste Responses with Distinct Dynamics. *J Neurosci* 33:9462–9473.
- 738 Liu H, Fontanini A (2015) State Dependency of Chemosensory Coding in the Gustatory Thalamus  
739 (VPMpc) of Alert Rats. *J Neurosci* 35:15479–15491.
- 740 Maier JX (2017) Single-neuron responses to intraoral delivery of odor solutions in primary olfactory and  
741 gustatory cortex. *J Neurophysiol* 117:1293–1304.
- 742 Maier JX, Wachowiak M, Katz DB (2012) Chemosensory Convergence on Primary Olfactory Cortex. *J*  
743 *Neurosci* 32:17037–17047.
- 744 McQueen KA, Fredericksen KE, Samuelsen CL (2020) Experience Informs Consummatory Choices for  
745 Congruent and Incongruent Odor-Taste Mixtures in Rats. *Chem Senses* 45:371.
- 746 Mease RA, Metz M, Groh A (2016) Cortical Sensory Responses Are Enhanced by the Higher-Order  
747 Thalamus. *Cell Rep* 14.
- 748 Meyers EM (2013) The neural decoding toolbox. *Front Neuroinform* 7.
- 749 Narayanan NS, Laubach M (2009) Delay activity in rodent frontal cortex during a simple reaction time  
750 task. *J Neurophysiol* 101.
- 751 Oyoshi T, Nishijo H, Asakura T, Takamura Y, Ono T (1996) Emotional and behavioral correlates of  
752 mediodorsal thalamic neurons during associative learning in rats. *J Neurosci* 16:5812–5829.
- 753 Parnaudeau S, O’Neill PK, Bolkan SS, Ward RD, Abbas AI, Roth BL, Balsam PD, Gordon JA,  
754 Kellendonk C (2013) Inhibition of Mediodorsal Thalamus Disrupts Thalamofrontal Connectivity and  
755 Cognition. *Neuron* 77:1151–1162.
- 756 Pelzer P, Horstmann H, Kuner T (2017) Ultrastructural and functional properties of a giant synapse

- 757 driving the piriform cortex to mediodorsal thalamus projection. *Front Synaptic Neurosci* 9:3.
- 758 Piette CE, Baez-Santiago MA, Reid EE, Katz DB, Moran A (2012) Inactivation of Basolateral Amygdala  
759 Specifically Eliminates Palatability-Related Information in Cortical Sensory Responses. *J Neurosci*  
760 32:9981–9991.
- 761 Plailly J, Howard JD, Gitelman DR, Gottfried JA (2008) Attention to Odor Modulates Thalamocortical  
762 Connectivity in the Human Brain. *J Neurosci* 28:5257–5267.
- 763 Prescott J (2012) Chemosensory learning and flavour: Perception, preference and intake. *Physiol*  
764 *Behav* 107:553–559.
- 765 Prescott J (2015) Multisensory processes in flavour perception and their influence on food choice. *Curr*  
766 *Opin Food Sci.*
- 767 Price JL, Slotnick BM (1983) Dual olfactory representation in the rat thalamus: An anatomical and  
768 electrophysiological study. *J Comp Neurol* 215:63–77.
- 769 Ray JP, Price JL (1992) The organization of the thalamocortical connections of the mediodorsal  
770 thalamic nucleus in the rat, related to the ventral forebrain-prefrontal cortex topography. *J Comp*  
771 *Neurol* 323:167–197.
- 772 Rebello MR, Kandukuru P, Verhagen J V. (2015) Direct behavioral and neurophysiological evidence for  
773 retronasal olfaction in mice. *PLoS One* 10:16–19.
- 774 Rikhye R V., Gilra A, Halassa MM (2018) Thalamic regulation of switching between cortical  
775 representations enables cognitive flexibility. *Nat Neurosci* 21.
- 776 Rousseaux M, Muller P, Gahide I, Mottin Y, Romon M (1996) Disorders of smell, taste, and food intake  
777 in a patient with a dorsomedial thalamic infarct. *Stroke* 27:2328–2330.
- 778 Saalman YB (2014) Intralaminar and medial thalamic influence on cortical synchrony, information  
779 transmission and cognition. *Front Syst Neurosci* 8:83.
- 780 Saalman YB, Pinsk MA, Wang L, Li X, Kastner S (2012) The pulvinar regulates information  
781 transmission between cortical areas based on attention demands. *Science* (80- ) 337.
- 782 Sadacca BF, Rothwax JT, Katz DB (2012) Sodium Concentration Coding Gives Way to Evaluative

- 783 Coding in Cortex and Amygdala. *J Neurosci* 32:9999–10011.
- 784 Sakai N, Yamamoto T (2001) Effects of excitotoxic brain lesions on taste-mediated odor learning in the  
785 rat. *Neurobiol Learn Mem* 75:128–139.
- 786 Samuelsen CL, Fontanini A (2017) Processing of Intraoral Olfactory and Gustatory Signals in the  
787 Gustatory Cortex of Awake Rats. *J Neurosci* 37:244–257.
- 788 Samuelsen CL, Gardner MPH, Fontanini A (2012) Effects of cue-triggered expectation on cortical  
789 processing of taste. *Neuron* 74:410–422.
- 790 Samuelsen CL, Gardner MPH, Fontanini A (2013) Thalamic Contribution to Cortical Processing of  
791 Taste and Expectation. *J Neurosci* 33:1815–1827.
- 792 Samuelsen CL, Vincis R (2021) Cortical Hub for Flavor Sensation in Rodents. *Front Syst Neurosci*  
793 15:130.
- 794 Schmitt LI, Wimmer RD, Nakajima M, Happ M, Mofakham S, Halassa MM (2017) Thalamic  
795 amplification of cortical connectivity sustains attentional control. *Nature* 545:219–223.
- 796 Schul R, Slotnick BM, Dudai Y (1996) Flavor and the frontal cortex. *Behav Neurosci* 110:760–765.
- 797 Sclafani A (2001) Psychobiology of food preferences. *Int J Obes* 25:S13–S16.
- 798 Scott GA, Liu MC, Tahir NB, Zabder NK, Song Y, Greba Q, Howland JG (2020) Roles of the medial  
799 prefrontal cortex, mediodorsal thalamus, and their combined circuit for performance of the odor  
800 span task in rats: Analysis of memory capacity and foraging behavior. *Learn Mem* 27.
- 801 Sela L, Sacher Y, Serfaty C, Yeshurun Y, Soroker N, Sobel N (2009) Spared and Impaired Olfactory  
802 Abilities after Thalamic Lesions.
- 803 Sherman SM (2016) Thalamus plays a central role in ongoing cortical functioning. *Nat Neurosci* 19.
- 804 Shi CJ, Cassell MD (1998) Cortical, thalamic, and amygdaloid connections of the anterior and posterior  
805 insular cortices. *J Comp Neurol* 399:440–468.
- 806 Small DM (2012) Flavor is in the brain. *Physiol Behav* 107:540–552.
- 807 Small DM, Veldhuizen MG, Felsted J, Mak YE, McGlone F (2008) Separable Substrates for  
808 Anticipatory and Consummatory Food Chemosensation. *Neuron* 57:786–797.

- 809 Staubli U, Schottler F, Nejat-Bina D (1987) Role of dorsomedial thalamic nucleus and piriform cortex in  
810 processing olfactory information. *Behav Brain Res* 25:117–129.
- 811 Stroh A, Adelsberger H, Groh A, Rühlmann C, Fischer S, Schierloh A, Deisseroth K, Konnerth A (2013)  
812 Making Waves: Initiation and Propagation of Corticothalamic Ca<sup>2+</sup> Waves In Vivo. *Neuron* 77.
- 813 Tham WWP, Stevenson RJ, Miller LA (2009) The functional role of the medio dorsal thalamic nucleus  
814 in olfaction. *Brain Res Rev* 62:109–126.
- 815 Tham WWP, Stevenson RJ, Miller LA (2011) The impact of mediodorsal thalamic lesions on olfactory  
816 attention and flavor perception. *Brain Cogn* 77:71–79.
- 817 Theyel BB, Llano DA, Sherman SM (2010) The corticothalamocortical circuit drives higher-order cortex  
818 in the mouse. *Nat Neurosci* 13.
- 819 Tong J, Mannea E, Aime P, Pfluger PT, Yi C-X, Castaneda TR, Davis HW, Ren X, Pixley S, Benoit S,  
820 Julliard K, Woods SC, Horvath TL, Sleeman MM, D'Alessio D, Obici S, Frank R, Tschop MH  
821 (2011) Ghrelin Enhances Olfactory Sensitivity and Exploratory Sniffing in Rodents and Humans. *J*  
822 *Neurosci* 31:5841–5846.
- 823 Veldhuizen MG, Small DM (2011) Modality-specific neural effects of selective attention to taste and  
824 odor. *Chem Senses* 36:747–760.
- 825 Verhagen J V., Engelen L (2006) The neurocognitive bases of human multimodal food perception:  
826 Sensory integration. *Neurosci Biobehav Rev* 30:613–650.
- 827 Vincis R, Fontanini A (2016) Associative learning changes cross-modal representations in the gustatory  
828 cortex. *Elife* 5:e16420.
- 829 Yang JW, Shih HC, Shyu BC (2006) Intracortical circuits in rat anterior cingulate cortex are activated by  
830 nociceptive inputs mediated by medial thalamus. *J Neurophysiol* 96.
- 831 Yarita H, Iino M, Tanabe T, Kogure S, Takagi SF (1980) A transthalamic olfactory pathway to  
832 orbitofrontal cortex in the monkey. *J Neurophysiol* 43.
- 833 Zhou H, Schafer RJ, Desimone R (2016) Pulvinar-Cortex Interactions in Vision and Attention. *Neuron*  
834 89.

835 **Figure Legends**

836 **Figure 1.** Tetrode locations and representative single-unit recording. **A, Left:** Example histological section  
837 showing the recording tetrode position (black arrow) in the mediodorsal thalamus. **Right:** Schematic  
838 summary of the reconstructed path of the tetrodes from 5 rats. The blue lines correspond to the  
839 dorsoventral range of each drivable tetrode bundle. CM, central medial thalamic nucleus. Hb, habenular  
840 nucleus. MD, mediodorsal thalamus. PVP, paraventricular thalamic nucleus. VM, ventromedial thalamic  
841 nucleus. **B, Left:** Representative single-unit recordings in the mediodorsal thalamus showing the principal  
842 component analysis of waveform shapes of 4 individual neurons. EL, electrode; NLE, Non-Linear energy.  
843 **Right:** Average single-unit response for the same 4 neurons recorded from each of the tetrode's 4 wires.  
844

845 **Figure 2.** Neurons in the mediodorsal thalamus represent chemosensory signals originating in the mouth.  
846 **A-C,** Peristimulus time histograms (PSTHs) of the chemoselective population's (n=85) normalized  
847 response (auROC; area under the receiver-operating characteristic) to **A.** odors, **B.** tastes, and **C.** odor-  
848 taste mixtures. **D-F,** representative chemoselective neurons firing rate raster plots and PSTHs to the  
849 intraoral delivery (time = 0, vertical dashed line) of **D.** water and the three odors (isoamyl acetate [red],  
850 benzaldehyde [cyan], methyl valerate [black], water [gray]), **E.** the four tastes (sucrose [blue], NaCl  
851 [magenta], citric acid [yellow], quinine [green]), and **F.** the four odor-taste mixtures (isoamyl acetate-  
852 sucrose [purple], benzaldehyde-sucrose [peach], benzaldehyde-citric acid [light blue], isoamyl acetate-  
853 citric acid [light green]). The representative examples illustrate the heterogeneity in responses, where  
854 activity was excited (left) or suppressed (right) by the intraoral delivery of chemosensory stimuli. **G-I,**  
855 Distribution of the number of chemoselective neurons responding to **G.** water and the three odors, **H.** the  
856 four tastes, and **I.** the four odor-taste mixtures. **J-L,** Tuning profiles within each stimulus category of the  
857 chemoselective neurons shows the proportion of neurons that did not respond, responded to a single  
858 stimulus, or responded to multiple stimuli for **J.** odors, **K.** tastes (middle), and **L.** odor-taste mixtures. \*\*\*  
859  $P < 0.001$ .

860

861 **Figure 3.** Intraoral chemosensory stimuli evoke excitation and suppression. **A-C**, auROC normalized  
862 population PSTHs of the responses excited (blue), suppressed (red), or non-responses (black) to **A.**  
863 odors, **B.** tastes, and **C.** odor-taste mixtures. Vertical dashed line indicates stimulus delivery (time = 0).  
864 Shaded area represents the SEM. Horizontal lines above and below traces indicate when responses  
865 significantly differed from those that did not respond (Wilcoxon rank sum,  $p < 0.05$ ). **D-F**, Pseudocolored  
866 heat maps of each significant response to **D.** odors, **E.** tastes, and **F.** odor-taste mixtures plotted from  
867 the most suppressed to the most excited for each stimulus. **G-I**, Eigenvectors of the first three principal  
868 components of the significant responses to **G.** odors, **H.** tastes, and **I.** odor-taste mixtures. Regardless of  
869 the stimulus category, PC 1 represented a monotonic component that lasted the entire 5 s temporal  
870 window, PC 2 represented a biphasic component, and PC 3 represented triphasic modulations.

871

872 **Figure 4.** The population decoding performance over time of the chemoselective neurons ( $n = 85$ ) and  
873 non-selective neurons ( $n = 50$ ) for each category of chemosensory stimuli for **C**, odors, **D**, tastes, and **E**,  
874 odor-taste mixtures. Note that the chemoselective population activity represented odors and odor-taste  
875 mixtures more quickly than tastes, but sustained responses to tastes and odor-taste mixtures longer than  
876 odors. Red-dashed line indicates chance-level. Vertical dashed line indicates stimulus delivery (time =  
877 0). The shaded area represents a 99.5% bootstrapped confidence interval (CI).

878

879 **Figure 5.** Mixture-selectivity index (MSI) of neurons in the mediodorsal thalamus. **A**, Raster plots and  
880 PSTHs from a representative neuron in the mediodorsal thalamus illustrating the differences in activity  
881 evoked by mixtures and their components: isoamyl acetate-sucrose mixture vs. isoamyl acetate alone  
882 (left) and benzaldehyde-sucrose mixture and sucrose alone (right). Vertical dashed line indicates stimulus  
883 delivery (time = 0). **B**, Time course of the average absolute mixture-selectivity index values for the 168  
884 mixture-selective responses (green line) and the 512 non-mixture-selective responses (black line) -2 s  
885 before to 5 s after intraoral delivery (200 ms bins). The mixture-selective responses significantly differ  
886 from baseline from 0.6 – 3 s (black bar) after stimulus delivery, while the non-mixture-selective responses

887 never differ from baseline. Shaded area represents the SEM. **C-E**, Population decoding performance  
888 over time of mixture-selective (n = 53) and non-mixture-selective neurons (n = 32) for **C**, odors, **D**, tastes,  
889 and **E**, odor-taste mixtures. Note that both populations had decoding performances above chance (red-  
890 dashed line) but with different temporal profiles. Black vertical dashed line indicates stimulus delivery  
891 (time = 0). The shaded area represents a 99.5% bootstrapped confidence interval (CI).

892

893 **Figure 6.** Processing of taste palatability by neurons in the mediodorsal thalamus. **A**, Raster plots and  
894 PSTHs from two neurons in the mediodorsal thalamus that represent the palatability-related features of  
895 tastes. The horizontal black bars indicate significant palatability-related difference in activity. Vertical  
896 dashed line indicates stimulus delivery (time = 0). **B**, Time course of the average palatability index (PI)  
897 value of the 23 palatability-related neurons (green line) and 62 non-palatability neurons (black line) -2 s  
898 before to 5 s after intraoral delivery (200 ms bins). The response of the palatability-related population  
899 significantly differs from baseline from 1.4 – 2 s (black bar) after stimulus delivery, while the average PI  
900 value of the non-palatability population never differs from baseline. Vertical dashed line indicates stimulus  
901 delivery (time = 0). Shaded area represents the SEM. **C-E**, Population decoding performance over time  
902 of palatability-related (n = 23) and non-palatability neurons (n = 62) for **C**, odors, **D**, tastes, and **E**, odor-  
903 taste mixtures. Note that both populations performed better than chance (red-dashed line) but with  
904 categorical and temporal differences. Vertical dashed line indicates stimulus delivery (time = 0). The  
905 shaded area represents a 99.5% bootstrapped confidence interval (CI).

906

## Figure 1

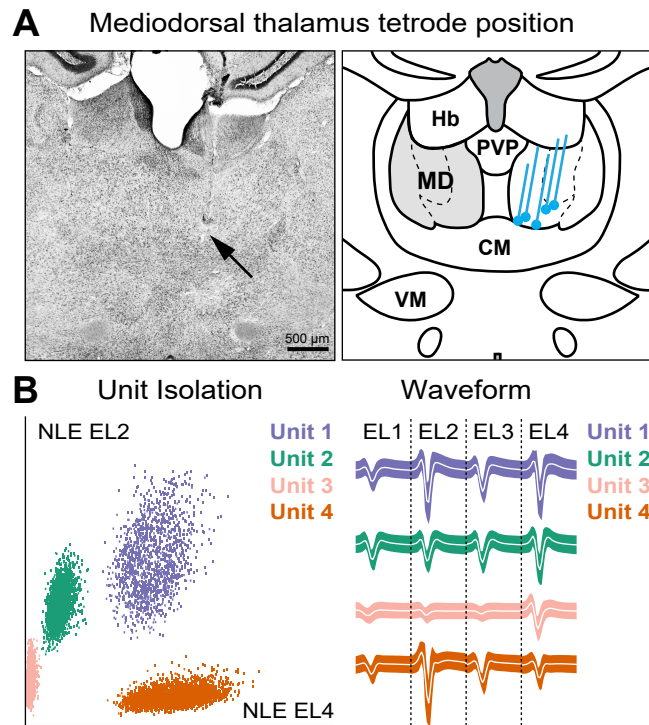



## Figure 2

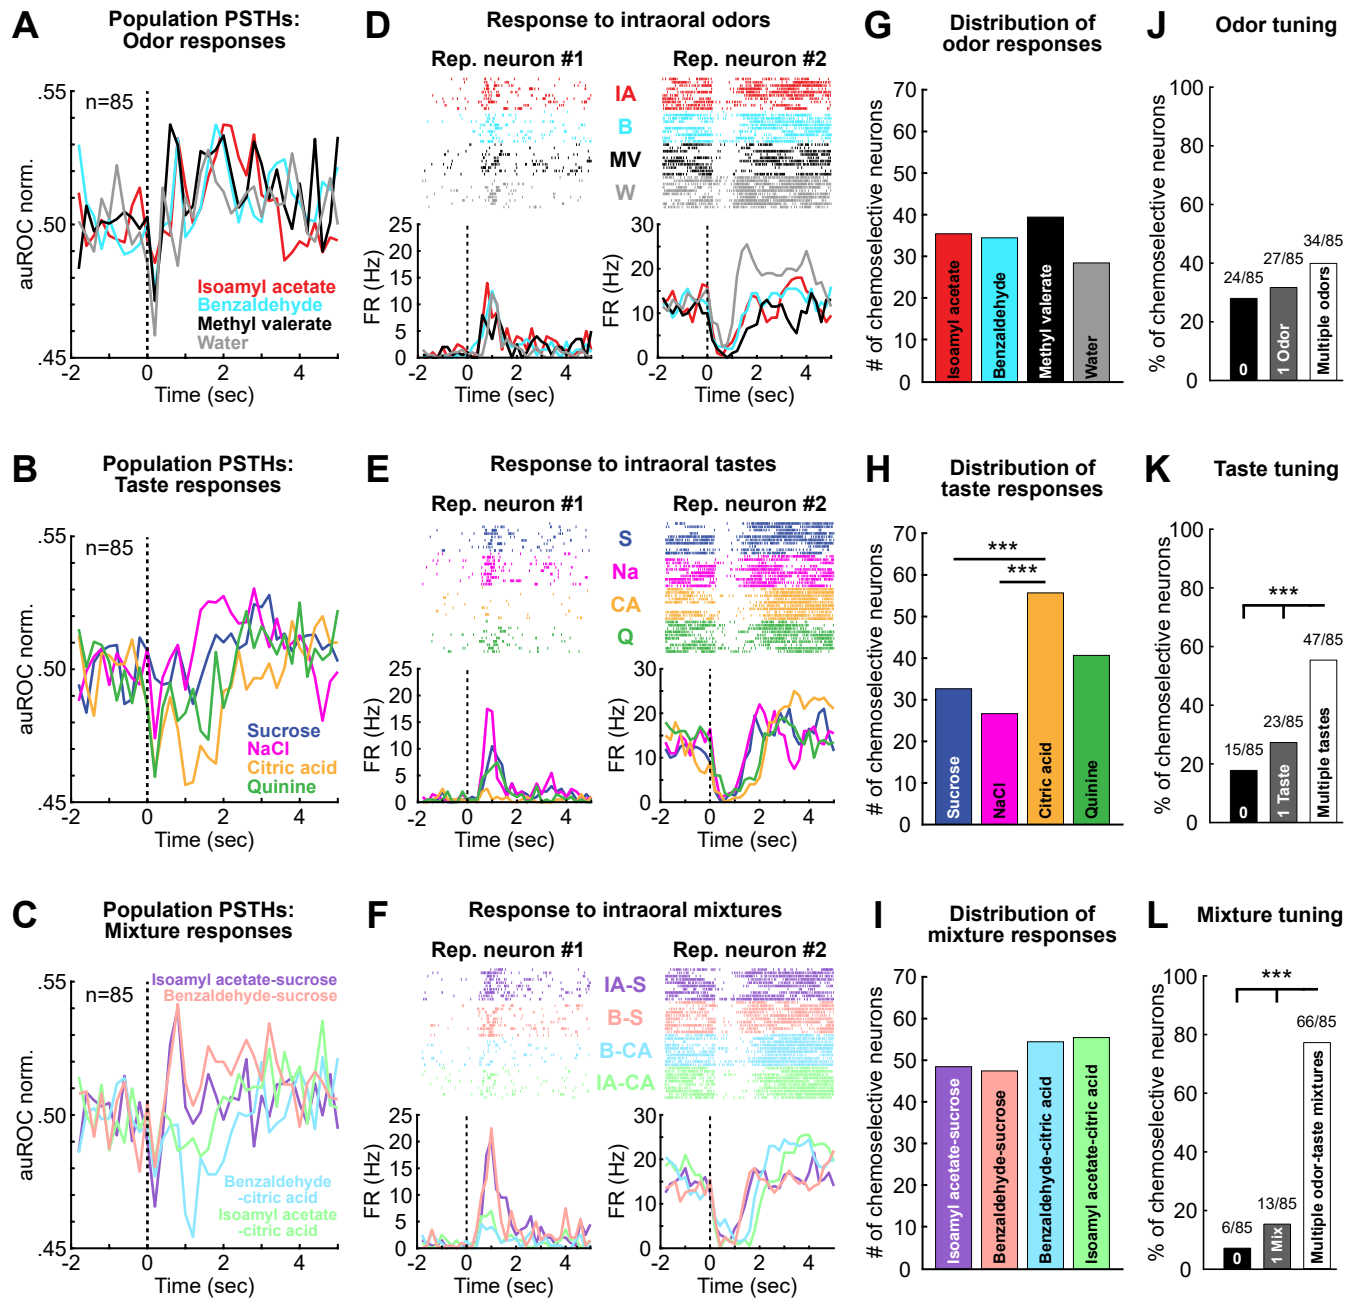

### Figure 3

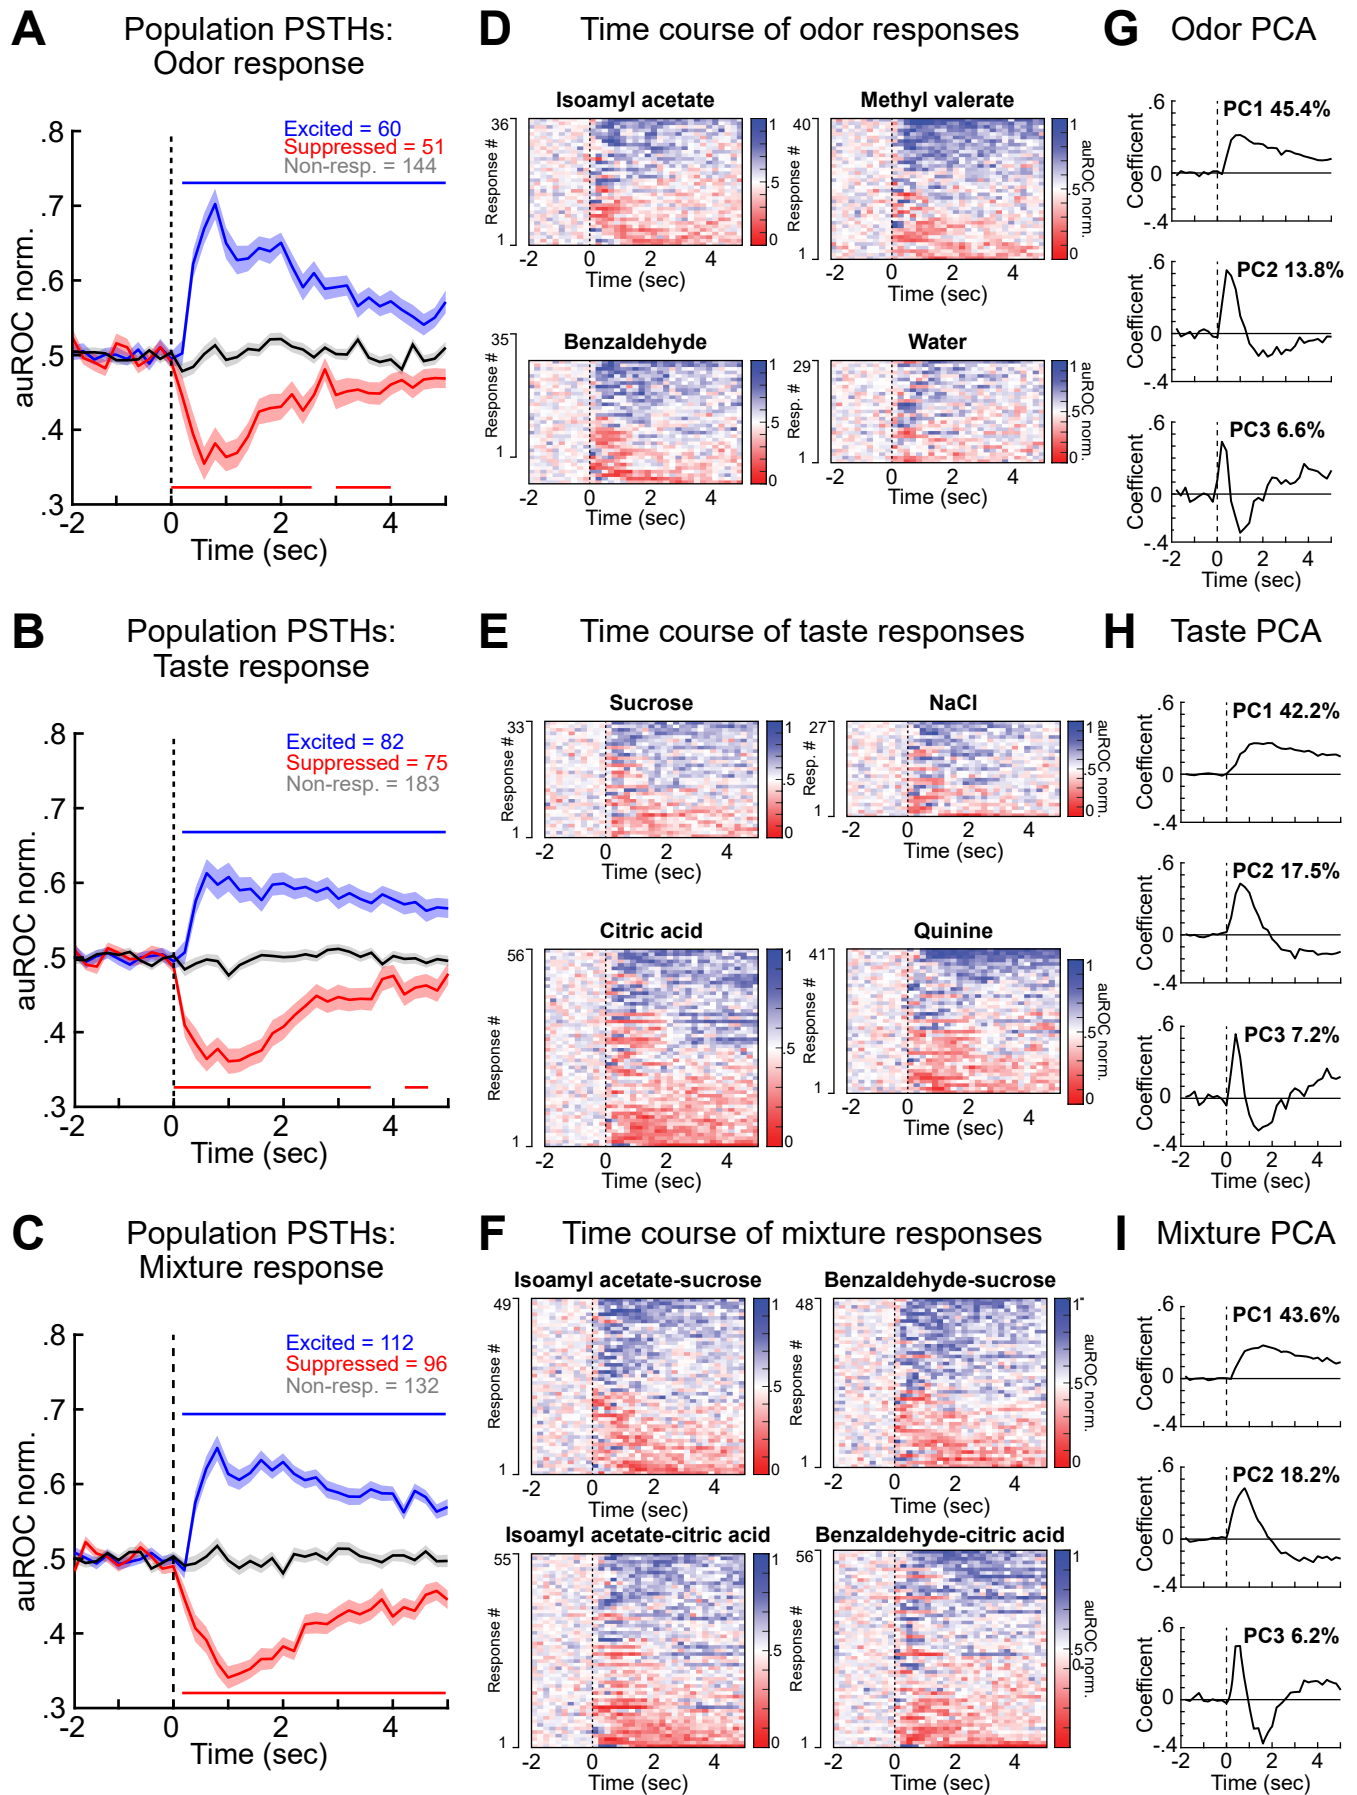

## Figure 4

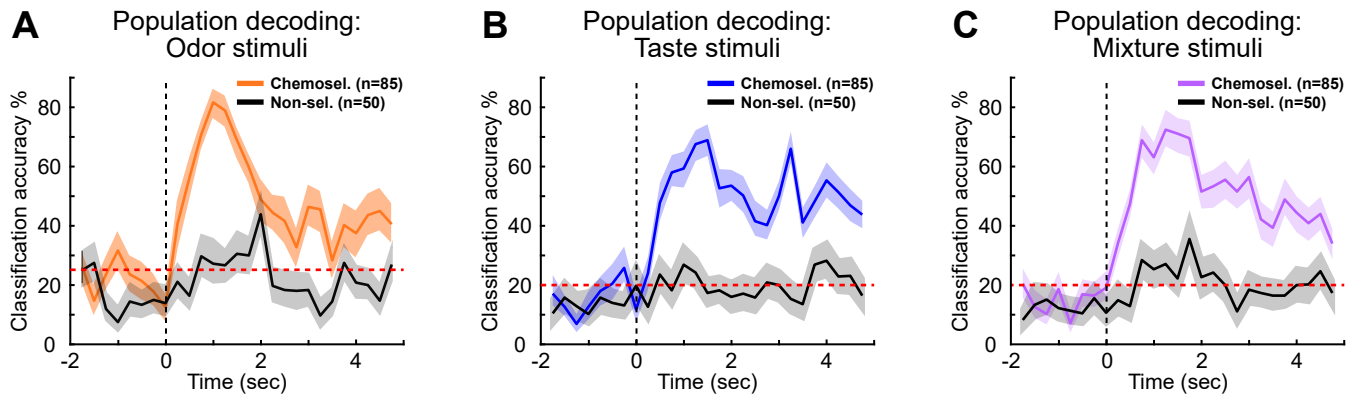

## Figure 5

### A Representative mixture-selective responses

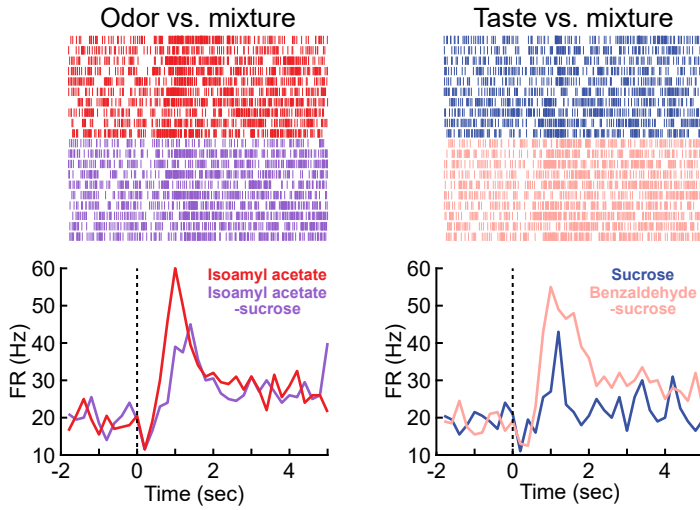

### B Time course of mixture-selectivity index

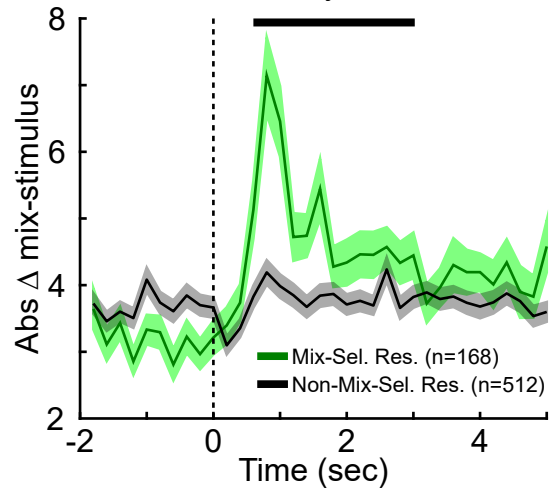

### C Mixture-selective population decoding: Odor stimuli

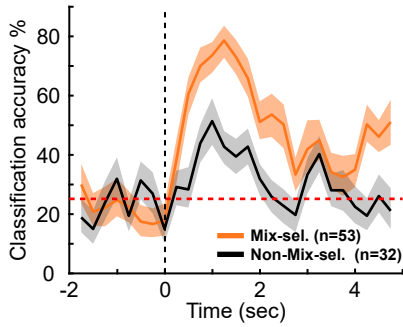

### D Mixture-selective population decoding: Taste stimuli

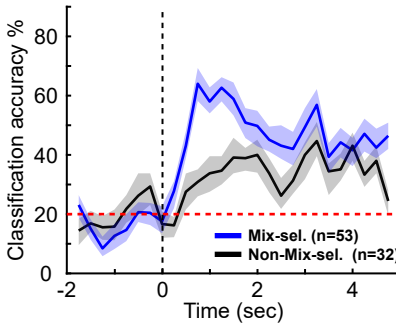

### E Mixture-selective population decoding: Mixture stimuli

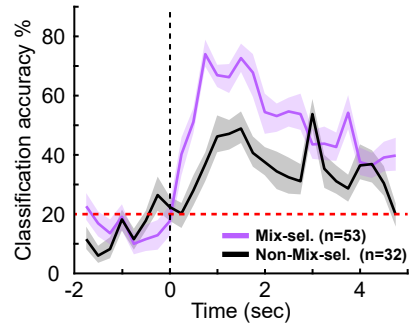

## Figure 6

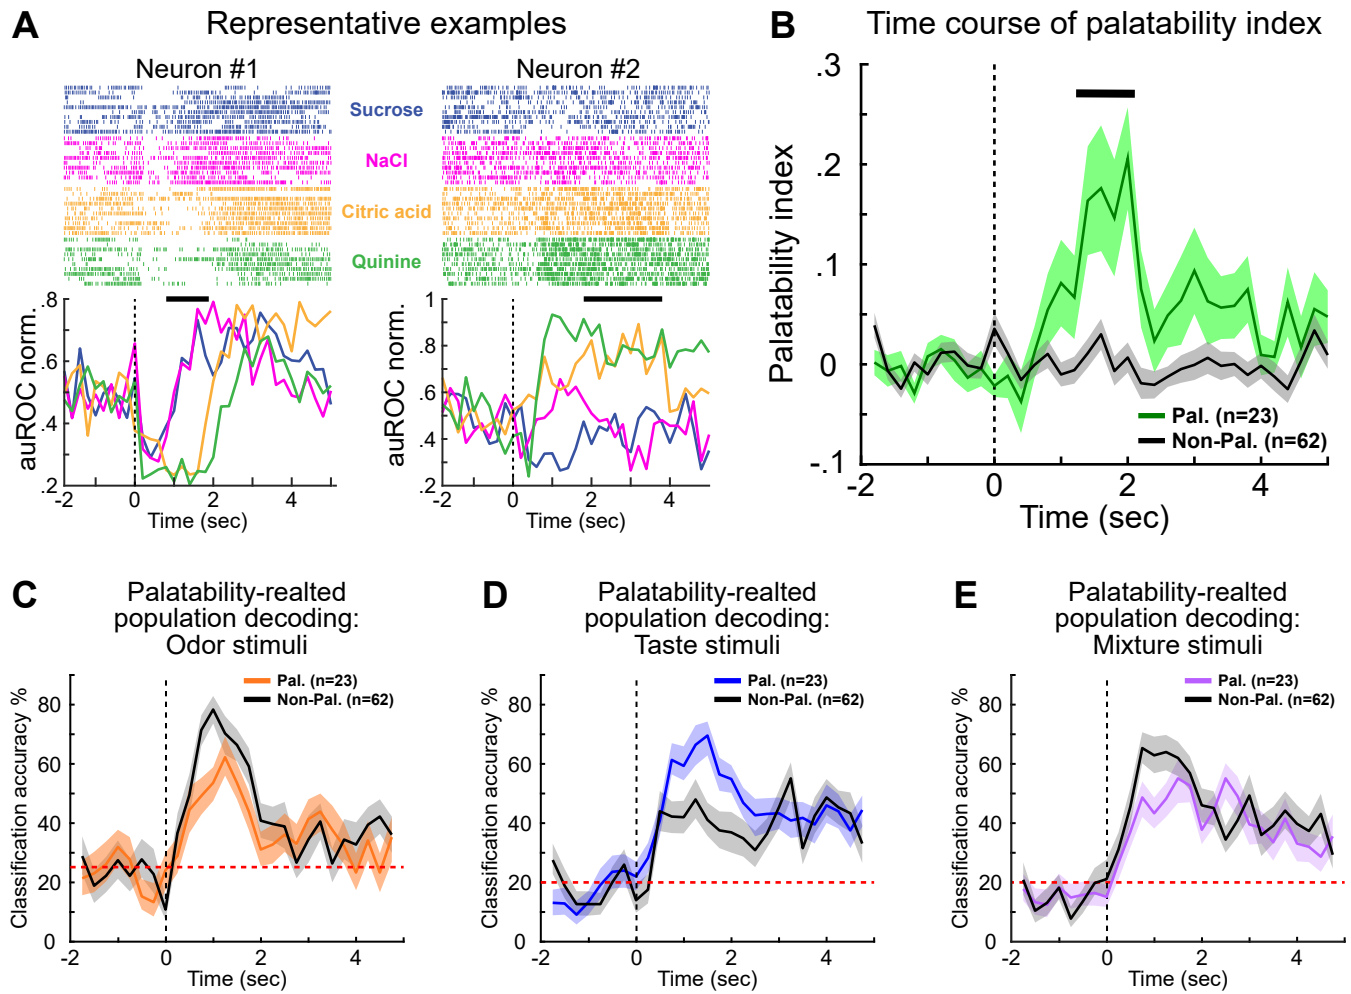

Source: https://www.biorxiv.org/content/10.1101/2022.04.06.487193v1.full.pdf
